# Supplementary material for: Illumination of the effect of the overlap of lone-pairs on indirect nuclear spin–spin coupling constants
Source: Royal Society of Chemistry journal article supplement (doi:10.1039/c1cp21422e), 2011-01-01
Supplement: c1cp21422e.pdf [file c1cp21422e.pdf]

## Supplementary Material

Table S1. The dominating role of the Fermi-contact contribution to the indirect nuclear spin-spin coupling constants considered in this work. Values in Hz. The SD term is not available in the deMon-NMR program.

| Compound                              |                    | FC     | PSO   | DSO   | Total  |
|---------------------------------------|--------------------|--------|-------|-------|--------|
| $\text{GeH}_3\text{N}(\text{PF}_2)_2$ | $^2\text{J}$ (P-P) | 408.19 | -1.98 | 0.18  | 406.39 |
| $\text{C}_2\text{H}_2(\text{PH}_2)_2$ | $^3\text{J}$ (P-P) | 173.53 | -0.06 | 0.01  | 173.48 |
| ethane                                | $^3\text{J}$ (H-H) | 12.68  | 0.07  | -0.10 | 12.65  |

Table S2. P...P distances in  $\text{GeH}_3\text{N}(\text{PF}_2)_2$  as a function of the P-N-P bond angle.

| Angle (deg.) | R(P...P) (Å) |
|--------------|--------------|
| 117.0696     | 2.9019       |
| 117.3196     | 2.9055       |
| 117.5696     | 2.9091       |
| 117.8196     | 2.9128       |
| 118.0696     | 2.9163       |
| 118.3196     | 2.9199       |
| 118.5696     | 2.9234       |
| 118.8196     | 2.9269       |
| 119.0696     | 2.9305       |
| 119.3196     | 2.9341       |
| 119.5696     | 2.9376       |
| 119.8196     | 2.9411       |
| 120.0696     | 2.9446       |

Table S3. Coefficients in front of the product of the localized molecular orbitals corresponding to the C-H bonds of the interacting protons for different values of the dihedral angle.

| Dihedral angle (deg.) | Coefficient<br>(Pipek-Mezey localization) | Coefficient<br>(Boys localization) |
|-----------------------|-------------------------------------------|------------------------------------|
| 0                     | 0.10380                                   | 0.10410                            |
| 15                    | 0.09858                                   | 0.09884                            |
| 30                    | 0.08517                                   | 0.08539                            |
| 45                    | 0.06825                                   | 0.06845                            |
| 60                    | 0.04992                                   | 0.05009                            |
| 75                    | 0.03013                                   | 0.03023                            |
| 90                    | 0.00730                                   | 0.00733                            |
| 105                   | 0.01945                                   | 0.01951                            |
| 120                   | 0.04786                                   | 0.04802                            |
| 135                   | 0.07223                                   | 0.07250                            |
| 150                   | 0.08820                                   | 0.08853                            |
| 165                   | 0.09608                                   | 0.09645                            |
| 180                   | 0.09872                                   | 0.09911                            |

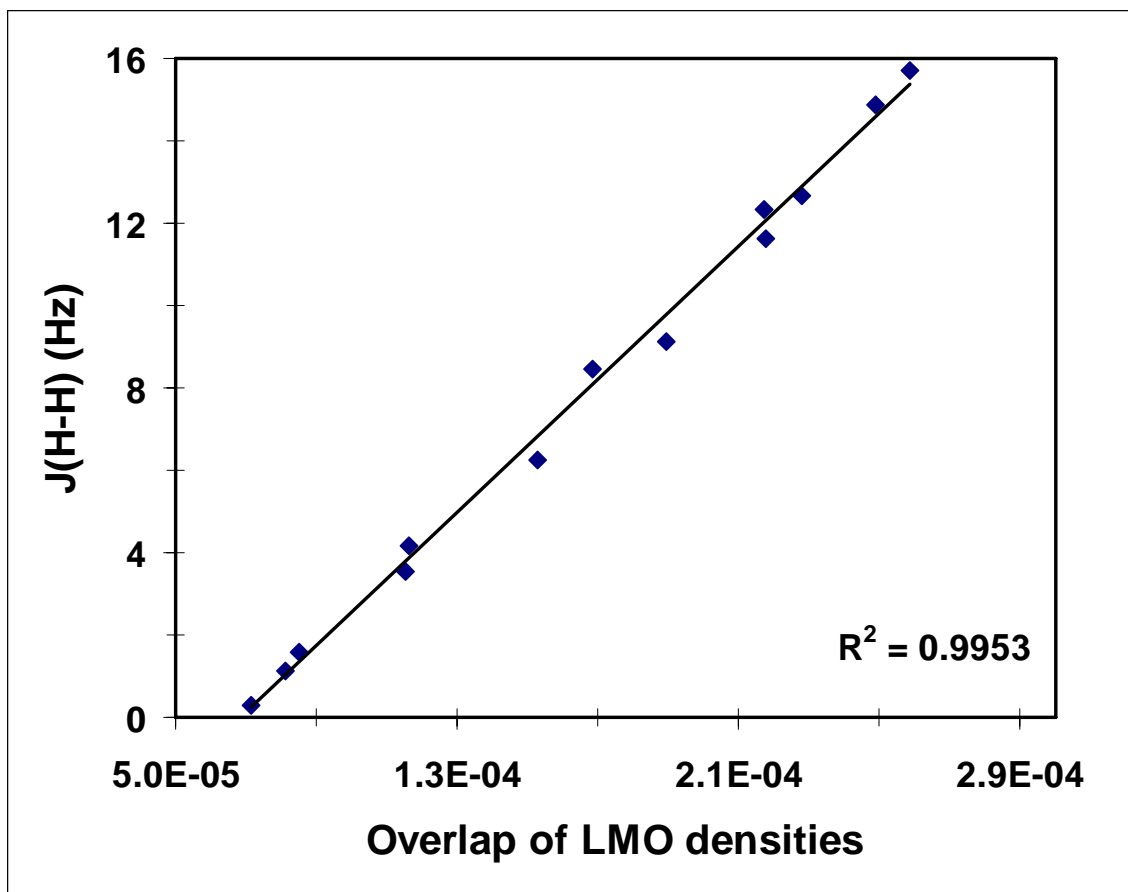

**Figure S1.** Correlation between  ${}^3J^{\text{FC}}(\text{H-H})$  (Hz) in ethane and the overlap of densities of the unperturbed localized molecular orbitals representing the C-H bonds.
